# Supplementary material for: Adapting a Wacker-type catalyst system to the palladium-catalyzed oxidative carbonylation of aliphatic polyols
Source: Royal Society of Chemistry journal article supplement (doi:10.1039/c0gc00817f), 2011-01-01
Supplement: c0gc00817f.pdf [file c0gc00817f.pdf]

## Supplementary information

### **Adapting a Wacker-Type Catalyst System to the Palladium-Catalyzed Oxidative Carbonylation of Aliphatic Polyols**

Franco Doro<sup>a</sup>, Patrick Winnertz<sup>a</sup>, Walter Leitner<sup>b,c</sup>, Angelina Prokofieva<sup>a</sup>,

Thomas E. Müller<sup>\*,a</sup>

<sup>a</sup> CAT Catalytic Center, ITMC, RWTH Aachen University, Worringerweg 1, D-52074 Aachen, Germany.

<sup>b</sup> Institut für Technische und Makromolekulare Chemie, Technische Chemie und Petrolchemie, RWTH Aachen University, Worringerweg 1, D-52074 Aachen, Germany.

<sup>c</sup> Max-Planck-Institut für Kohlenforschung, Kaiser-Wilhelm-Platz 1, 45470 Mülheim an der Ruhr, Germany

Corresponding Author:

Dr. Thomas Ernst Müller. Tel.: + 49. 241. 80 - 28 594; Fax: +49. 241. 80 22 593;

E-mail: [Thomas.Mueller@CatalyticCenter.RWTH-Aachen.de](mailto:Thomas.Mueller@CatalyticCenter.RWTH-Aachen.de)

## Experimental

**Materials and instrumentation:** All reagents and solvents were purchased from commercial suppliers (Table 1) and used as received.

**Table 1.** Source and purity of reagents obtained from commercial suppliers

| Chemical                                      | Supplier          | Purity <sup>a</sup> / % |
|-----------------------------------------------|-------------------|-------------------------|
| Dimethyl ethylene glycol (DME)                | Sigma Aldrich     | 99.9                    |
| Ethylene glycol (EG)                          | Sigma Aldrich     | 99.8                    |
| Propylene glycol (PG)                         | Sigma Aldrich     | 99.5                    |
| Phenylethylene glycol (PEG)                   | Sigma Aldrich     | 97                      |
| Ethylene carbonate (EC)                       | Sigma Aldrich     | >99.0                   |
| Propylene carbonate (PC)                      | Fluka             | 99.7                    |
| Palladium(II)acetate                          | Sigma Aldrich     | >99.9                   |
| Palladium(II)bromide                          | Sigma Aldrich     | 99                      |
| Palladium(II)chloride                         | Alfa Aesar        | 99.9                    |
| Copper(II)chloride                            | Sigma Aldrich     | >99.9                   |
| Sodium acetate                                | Sigma Aldrich     | >99.0                   |
| Potassium bromide                             | ABCR              | >99.9                   |
| Manganese(III)acetylacetonate                 | Sigma Aldrich     | tech.                   |
| Potassium chloride                            | Fisher Scientific | >99                     |
| Lithium chloride                              | Sigma Aldrich     | >99.0                   |
| Triethylamine                                 | Fluka             | >99.5                   |
| Gas mixture CO/O <sub>2</sub> /N <sub>2</sub> | Air Products      | 5.99:2.99:91.02         |
| Tetrabutylammonium bromide (TBAB)             | Fluka             | >99.0                   |
| Diethylene glycol dimethyl ether              | Sigma Aldrich     | 99.5                    |

<sup>a</sup> minimum purity as stated by the manufacturer

Gas chromatographic analyses were performed on a Focus GC-Thermo Scientific or Siemens SiChromat 1-4 gas chromatograph. For HPLC analysis, a Jasco instrument was used (pump = PU-2080*Plus*; degaser = DG-2080-54; gradient = LG-2080-04S; autosampler = AS-2055*Plus*; Diode-Array-Detector = MD-2010*Plus*; RI-Detector = RI-2031*Plus*)

**Oxidative carbonylation of diols:** The experiments were performed in 20 mL stainless steel autoclaves equipped with thermocouple, glass liner and magnetic stirring bar. In a typical experiment, the glass liner was charged with ethylene glycol (56 mg, 0.9 mmol), KBr (10.7 mg, 0.09 mmol), Pd(OAc)<sub>2</sub> (0.71  $\mu$ mol, 200  $\mu$ L, 3.56 mM in DME), Mn(acac)<sub>3</sub> (5.0 mg, 14.3  $\mu$ mol) and DME (2 mL). The autoclave was purged three times with argon (4 bar) and subsequently pressurized with 20 bar of a gas mixture CO:O<sub>2</sub>:N<sub>2</sub> (6:3:91). The reaction mixture was stirred with 300 rpm at 60 °C. After 20 h, the autoclave was cooled down and the pressure released. Diethylene glycol dimethyl ether (DiglyMe) (0.70 mmol, 100  $\mu$ L) was added as internal standard for gas chromatography and the solution filtered through a polyamide filter with a pore size of 0.20  $\mu$ m.

The conditions for gas chromatographic analysis of ethylene glycol (EG), propylene glycol (PG), 3-methoxypropane-1,2-diol (MG) were as follows: CP-Wax-58-CB column, inlet temperature = 250 °C, initial temperature = 50 °C (5 min), 50-180 °C with a  $\Delta$ T (10 °C/min) and 180 °C (27 min), FID temperature = 250 °C;  $t_{EG}$  = 14.97 min,  $t_{PG}$  = 14.42 min,  $t_{MG}$  = 16.91 min,  $t_{EG-carbonate}$  = 18.82 min,  $t_{PG-carbonate}$  = 17.69 min,  $t_{MG-carbonate}$  = 21.39 min,  $t_{DiglyMe}$  = 10.58 min.

Phenyl ethylene glycol (PEG) was analysed at the following conditions: Rtx-5-Sil-MS column, inlet temperature = 250 °C, initial temperature = 80 °C (5 min), 80-300 °C with a  $\Delta$ T (12 °C/min) and 180 °C (27 min), FID temperature = 300 °C;  $t_{PEG}$  = 10.74 min,  $t_{PEG-carbonate}$  = 13.10 min,  $t_{DiglyMe}$  = 3.76 min.

**Oxidative carbonylation of glycerol:** The experiments were performed in 200 mL stainless steel autoclaves equipped with thermocouple and magnetic stirring bar. In a

typical experiment, the autoclave was charged with glycerol (492 mg, 5.34 mmol), KBr (212 mg, 1.78 mmol), Pd(OAc)<sub>2</sub> (4.0 mg, 17.8 μmol), Mn(acac)<sub>3</sub> (126 mg, 360 μmol), and ethyl acetate (100 mL). The autoclave was purged three times with argon (4 bar) and subsequently pressurized with 20 bar of a gas mixture CO:O<sub>2</sub>:N<sub>2</sub> (6.3:91). The reaction mixture was stirred with 300 rpm at 60 °C. After 20 h, the autoclave was cooled down and the pressure released. The solution was filtered through a polyamide filter with a pore size of 0.20 μm.

Selectivity and conversion were determined by HPLC (Showa Denko - Sugar SH1011 column, oven temperature = 20 °C, flow = 1.0 mL/min, eluent: 0.01% acetic acid in water, *t*<sub>glycerol</sub> = 9.91 min, *t*<sub>glycerol-carbonate</sub> = 14.39 min).

## Results and additional data

In order to assess the role of KBr, a series of tests at different Pd:KBr ratios was carried out. The catalyst productivity significantly increased, when KBr was used as additive in a Pd:KBr ratio of 1:5. Surprisingly, further increase in the KBr concentration hardly affected the catalyst productivity in the Pd:KBr range of 1:5 to 1:500 (Table 2).

**Table 2.** Effect of the Pd/KBr ratio on the oxidative carbonylation of **1a**<sup>a</sup>

| Entry | Pd/KBr | TON  |
|-------|--------|------|
| 1     | 1/0    | 13.6 |
| 2     | 1/5    | 117  |
| 3     | 1/10   | 109  |
| 4     | 1/50   | 105  |
| 5     | 1/100  | 123  |
| 6     | 1/500  | 113  |

<sup>[a]</sup> *Reaction conditions:* [**1a**]<sup>0</sup> = 0.45 mM, **1a**:Pd(OAc)<sub>2</sub>:Mn(acac)<sub>3</sub> = 1250:1:20, solvent = DME (2 mL), T = 60 °C, 20 bar CO:O<sub>2</sub>: N<sub>2</sub> (6.3:91), reaction time = 2 h.

The effect of various additives such as KCl, LiCl and tetrabutylammonium bromide (TBAB) on the performance of the catalyst in the oxidative carbonylation of **1a** was also explored (Table 3). Potassium bromide provided the highest turnover numbers.

**Table 3.** Effect of different additives on the oxidative carbonylation of **1a**<sup>a</sup>

| Entry | Additive           | TON  |
|-------|--------------------|------|
| 1     | -                  | 17   |
| 2     | NaOAc <sup>b</sup> | 17.4 |
| 3     | TBAB               | 23   |
| 4     | KBr                | 123  |
| 5     | KCl                | 32   |
| 6     | LiCl               | 45   |

<sup>[a]</sup> *Reaction conditions:* [**1a**]<sub>0</sub> = 0.45 mM; **1a**:Pd(OAc)<sub>2</sub>:Mn(acac)<sub>3</sub>:additive = 1250:1:20:100; solvent = DME (2 mL); T = 60 °C, 20 bar CO:O<sub>2</sub>:N<sub>2</sub> (6:3:91); time = 2 h.

<sup>[b]</sup> Pd(OAc)<sub>2</sub>:additive = 1/1000, reaction time = 20 h
